# Supplementary material
Source: publisher site journal article supplement (https://www.dovepress.com/article/240728)
Supplement: Supplementary file 1 [file get_supplementary_file.php]

**Supplement Figure 1** Random blood glucose and body weight. **(A)** Random blood glucose of fa/fa group was significantly higher than fa/+ group. \*\*\*p < 0.001, fa/fa vs. fa/+. **(B)** Body weight of fa/fa group was significantly higher than fa/+ group. \*\*\*p < 0.001, fa/fa vs. fa/+.

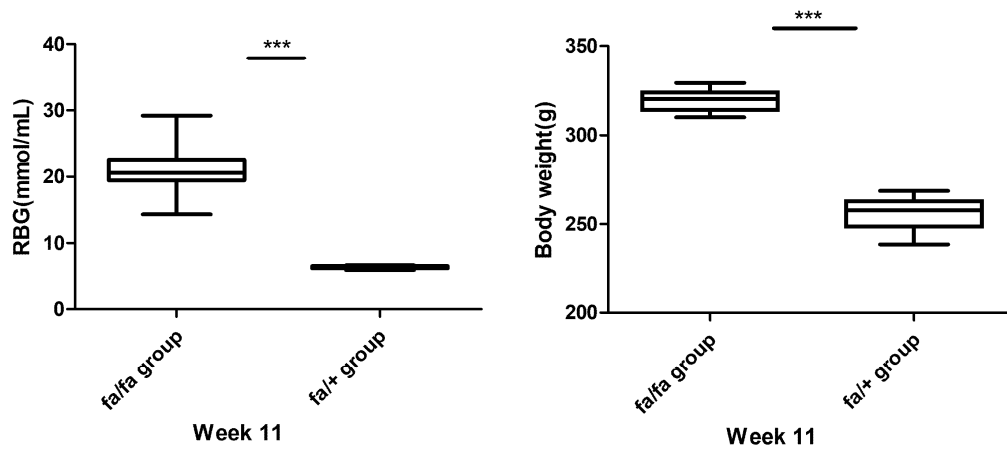

**Supplement Figure 2** Comparative figure of relative abundance of each biomarker in fa/fa and fa/+ group, respectively.

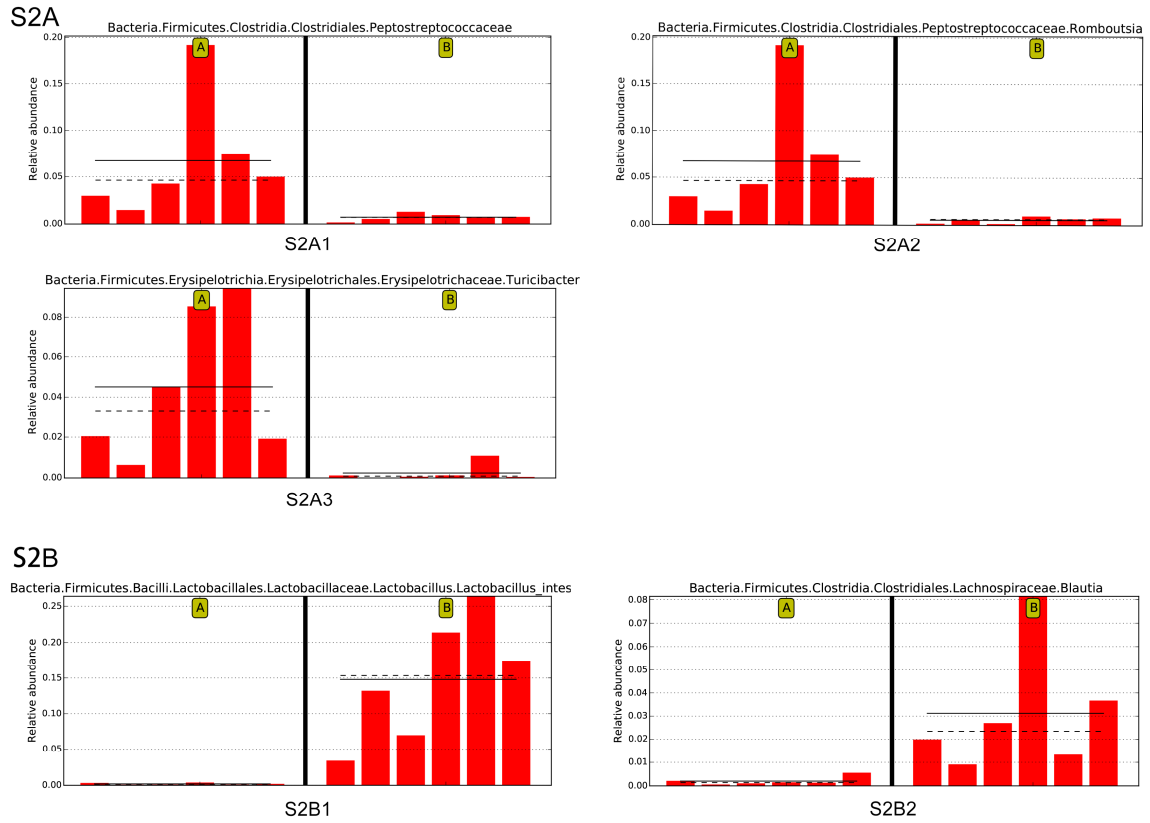

**Supplementary Table 1**

| Taxonomy              | fa/fa group |       |       |       |       |       |            | fa/+ group |       |       |       |       |       |            |
|-----------------------|-------------|-------|-------|-------|-------|-------|------------|------------|-------|-------|-------|-------|-------|------------|
|                       | gN.1        | gN.2  | gN.3  | gN.4  | gN.5  | gN.6  | Percentage | gP.1       | gP.2  | gP.3  | gP.4  | gP.5  | gP.6  | Percentage |
| Firmicutes            | 37589       | 48887 | 39471 | 40788 | 42738 | 33270 | 58.778%    | 45953      | 61456 | 64531 | 49353 | 43851 | 48461 | 69.902%    |
| Bacteroidetes         | 36239       | 24226 | 2788  | 31904 | 26824 | 39409 | 39.079%    | 27529      | 12705 | 9448  | 24517 | 26236 | 26031 | 28.189%    |
| Proteobacteria        | 184         | 192   | 57    | 381   | 48    | 259   | 0.271%     | 663        | 136   | 141   | 452   | 3222  | 170   | 1.066%     |
| Verrucomicrobia       | 182         | 208   | 42    | 663   | 2442  | 389   | 0.951%     | 44         | 11    | 183   | 112   | 70    | 108   | 0.118%     |
| Tenericutes           | 204         | 563   | 108   | 266   | 888   | 448   | 0.600%     | 96         | 166   | 80    | 249   | 1676  | 250   | 0.561%     |
| Actinobacteria        | 37          | 99    | 139   | 64    | 186   | 76    | 0.146%     | 37         | 81    | 215   | 39    | 52    | 23    | 0.100%     |
| unidentified_Bacteria | 9           | 34    | 8     | 35    | 87    | 31    | 0.049%     | 0          | 0     | 0     | 0     | 2     | 2     | 0.001%     |
| Melainabacteria       | 24          | 48    | 0     | 3     | 3     | 29    | 0.026%     | 9          | 6     | 7     | 45    | 5     | 25    | 0.022%     |
| Lentisphaerae         | 15          | 3     | 1     | 6     | 1     | 42    | 0.016%     | 1          | 1     | 3     | 16    | 11    | 3     | 0.008%     |
| Deferribacteres       | 6           | 4     | 0     | 27    | 5     | 0     | 0.010%     | 10         | 0     | 0     | 8     | 11    | 1     | 0.007%     |
| Fusobacteria          | 2           | 0     | 0     | 0     | 0     | 0     | 0.000%     | 2          | 0     | 0     | 1     | 12    | 0     | 0.003%     |
| Cyanobacteria         | 1           | 1     | 0     | 9     | 1     | 8     | 0.005%     | 1          | 4     | 0     | 1     | 2     | 4     | 0.003%     |
| Thermotogae           | 0           | 0     | 0     | 6     | 0     | 0     | 0.001%     | 0          | 0     | 0     | 0     | 0     | 1     | 0.000%     |
| Planctomycetes        | 0           | 0     | 1     | 0     | 0     | 0     | 0.000%     | 0          | 0     | 0     | 0     | 3     | 0     | 0.001%     |
| Others                | 71          | 69    | 1     | 52    | 19    | 64    | 0.067%     | 17         | 9     | 4     | 34    | 15    | 14    | 0.021%     |
| Total                 | 74563       | 74334 | 42616 | 74204 | 73242 | 74025 | 100.000%   | 74362      | 74575 | 74612 | 74827 | 75168 | 75093 | 100.000%   |
